# Supplementary material
Source: publisher site journal article supplement (https://www.spandidos-publications.com/4122/downloadSupplementary)
Supplement: Supplementary file 1 [file downloadSupplementary]

## Sheet: Mfn1
Table SIII.The comparisons among the mRNA expression levels between patients with MG (including 6 AChR-Ab-negative patients) and the control group.
mRNA expression of Mfn1
Control	MG		AChR-Ab（-）
1.28276	0.648282			Control	MG
1.21809	0.964576		mRNA expression of Mfn1	1.28276	0.648282
1.01262	1.17195			1.95457	0.828541
1.60449	0.992628			1.09417	0.933427
1.24151	1.29852			0.659645	0.469272
0.888244	0.801739			0.666436	0.43731
1.26158	0.620255			0.587522	0.860217
1.02061	0.98976		Mean	1.04085	0.696175
2.01035	0.927247		SD	0.480842	0.192141
2.19506	0.867616
2.61522	0.341293
1.63749	1.077
1.35465	0.725436
1.95457	0.828541
1.528	1.1055
1.48552	0.613294
0.888665	1.01749
1.05826	0.496018
0.923342	0.494321
1.12616	0.415745
1.33779	0.40695
0.600982	0.535941
1.09417	0.933427
1.33627	0.565021
0.996844	0.763075
1.06881	0.780066
0.764219	1.46949
0.81061	0.880308
0.622028	0.834785
0.69586	0.959958
0.659645	0.469272
0.624886	1.25346
0.765161	1.45584
0.73099	1.11633
0.552934	0.0220253
0.657121	0.458276
0.666436	0.43731
0.538167	0.024134
0.942014	0.33585
0.487677	0.429068
0.598787	0.371501
0.517613	0.495159
0.797512	0.478997
0.472733	0.595468
0.65795	0.775775
0.492103	0.736353
0.57382	0.733985
0.549291	0.773857
0.492863	0.815895
0.587522	0.860217

## Sheet: Mfn2
mRNA expression of Mfn2
Control	MG		AChR-Ab（-）
1.0939	0.908508			Control	MG
0.932623	1.57273		mRNA expression of Mfn2	1.0939	0.908508
3.27377	0.664925			0.586707	0.60817
1.32469	0.560103			1.09323	1.28461
0.923868	0.74941			1.40888	0.478447
0.856778	0.624847			0.937248	0.365384
0.904763	0.932298			0.967158	0.862402
0.8718	0.705048		Mean	1.01452	0.751254
0.757337	0.879881		SD	0.244696	0.30696
0.843161	0.889163
0.70371	0.589104
1.02123	1.45756
0.786491	0.661415
0.586707	0.60817
0.743051	0.842437
0.809385	0.709046
1.34602	1.28157
0.916685	0.878535
1.63989	1.24514
1.44144	0.895125
1.26138	0.659985
0.785918	1.1139
1.09323	1.28461
1.46251	0.914308
1.15096	1.21703
1.43947	0.787163
1.06883	1.83538
1.23367	1.15144
1.19534	1.13677
1.49329	0.97915
1.40888	0.478447
0.829364	1.49258
0.775935	1.25498
0.810755	0.929833
0.489141	0.431271
0.629098	0.425831
0.937248	0.365384
0.72494	0.400432
0.773859	0.361424
0.984667	0.386369
0.711119	0.620758
0.719402	0.316522
1.07262	0.36783
0.697547	0.50661
0.550178	0.786834
0.90728	0.521049
0.884649	0.594135
0.589978	0.620339
0.808409	0.760254
0.967158	0.862402

## Sheet: Opa1
mRNA expression of Opa1
Control	MG		AChR-Ab（-）	AchR-Ab	AchR-Ab
1.16009	1.00935			Control	MG
1.19168	0.746382		mRNA expression of Opa1	1.16009	1.00935
1.33109	1.18689			1.51427	0.216153
1.4145	1.07829			0.913942	1.59008
1.45041	0.323213			0.867871	0.602515
0.858396	1.05193			0.788779	0.554123
1.17801	1.28585			0.692365	0.381901
1.20452	0.965126		Mean	0.989554	0.725687
1.57792	1.13994		SD	0.274945	0.456446
1.43341	0.631194
1.20288	0.302986
1.28192	1.12854
1.34182	0.563163
1.51427	0.216153
1.46306	1.05892
1.20321	0.78512
0.961112	1.55745
1.29953	0.604223
1.16653	1.07114
1.47937	1.05585
1.49176	0.775734
0.859588	0.0686158
0.913942	1.59008
1.5884	0.137282
1.23437	1.01781
1.04608	1.20466
1.03902	1.7752
1.02398	0.984591
0.787873	0.320498
0.937012	1.25873
0.867871	0.602515
0.732082	1.53303
0.699705	1.90753
0.697947	1.49889
0.472126	0.0205613
0.610747	0.616657
0.788779	0.554123
0.52203	0.0226698
0.822438	0.412367
1.97668	0.66117
0.31317	0.503602
0.540819	0.468598
0.768242	0.49595
0.648265	0.827485
0.468141	0.952439
0.299077	0.880042
0.384652	0.650833
0.495361	0.544875
0.563772	0.456167
0.692365	0.381901

## Sheet: Fis1
mRNA expression of Fis1
Control	MG		AChR-Ab（-）	AchR-Ab	AchR-Ab
0.614789	0.844103			Control	MG
0.741017	0.861799		mRNA expression of Fis1	0.614789	0.844103
0.824214	1.01246			0.603847	0.76823
0.868707	1.08028			0.963358	0.637521
0.890664	0.964241			0.895338	1.09543
0.67549	0.552862			0.805629	0.793162
0.892304	1.02012			0.792728	1.07852
0.807564	1.19192		Mean	0.779281	0.869494
0.867339	0.797295		SD	0.132956	0.16597
0.925897	0.773122
0.240821	0.667582
1.06721	0.613271
0.648295	0.671928
0.603847	0.76823
0.920058	0.650862
0.665878	0.556707
0.892619	0.692936
0.671591	0.718653
0.543538	0.616787
0.665449	0.945435
0.644495	0.887096
0.808921	0.522139
0.963358	0.637521
0.909737	1.2545
0.706323	0.746691
0.79501	0.752137
0.98295	0.743026
0.571745	0.761985
0.930401	1.09264
0.637665	1.40007
0.895338	1.09543
0.863482	1.39774
1.61226	1.22493
0.961271	1.1645
0.673091	1.15596
0.68898	1.19488
0.805629	0.793162
0.648218	1.26493
0.536238	1.36517
0.937429	2.0219
0.512218	1.44231
0.915676	1.08383
0.866817	1.54179
1.09966	0.835022
1.1003	1.29851
1.09755	1.0239
0.932815	1.57122
0.883565	1.2305
0.836915	1.41739
0.792728	1.07852

## Sheet: Drp1
mRNA expression of Drp1
Control	MG		AChR-Ab（-）	AchR-Ab	AchR-Ab
1.53097	1.13019			Control	MG
1.25406	1.94859		mRNA expression of Drp1	1.53097	1.13019
2.75203	1.28249			1.37122	0.887869
2.33323	1.11132			0.963396	1.60836
1.31706	1.50603			0.851905	0.632699
1.02881	1.19042			0.880696	0.915462
1.36488	2.90755			0.143478	0.763167
1.43844	1.32512		Mean	0.956944	0.989625
0.640732	1.43158		SD	0.443423	0.315469
1.16263	1.17032
0.679707	1.47587
1.37097	1.35436
1.14914	0.75254
1.37122	0.887869
0.8737	1.25371
0.578913	0.896392
1.22171	1.55732
1.41443	1.11451
1.34358	0.91663
1.76738	0.9687
1.75111	1.39417
0.523077	1.12118
0.963396	1.60836
1.88411	1.21983
1.19805	0.927273
0.568948	1.05154
0.935042	1.71857
1.13243	0.982546
0.838447	1.3592
0.943811	1.44254
0.851905	0.632699
0.750342	1.50309
0.722152	2.54567
0.805876	1.37255
0.424514	1.06022
0.590141	0.547447
0.880696	0.915462
0.658372	0.945999
0.84409	0.895395
0.661012	0.619039
0.508331	0.602013
0.519006	1.49936
0.91448	0.465964
0.708457	0.770771
0.702447	0.835873
0.388343	0.85236
0.538578	1.54001
0.500318	1.53544
0.555445	0.765439
0.143478	0.763167

## Sheet: AMPK
mRNA expression of AMPK
Control	MG		AChR-Ab（-）	AchR-Ab	AchR-Ab
0.871209	1.06754			Control	MG
1.05495	1.19252		mRNA expression of AMPK	0.871209	1.06754
1.18538	1.31009			1.07285	0.982971
1.29094	1.24846			1.35955	0.759719
1.1092	1.34212			3.01505	1.17988
0.956949	0.942318			1.21556	1.19921
0.88393	1.34173			0.553333	0.635328
1.00246	1.09209		Mean	1.34793	0.970777
0.966069	1.3517		SD	0.788593	0.209162
1.09297	1.02249
0.793614	0.764935
1.13129	1.03959
0.586053	0.846785
1.07285	0.982971
1.05477	1.01873
0.782303	0.841618
1.07823	0.848523
0.795383	0.856614
0.737926	0.879386
0.671519	0.925456
0.745603	1.1674
0.783145	0.542906
1.35955	0.759719
0.931258	1.37134
0.789894	0.701544
0.848876	1.25901
0.767016	0.765687
0.831882	0.623921
2.06073	1.40555
2.77038	1.21935
3.01505	1.17988
2.48027	1.36049
3.46624	1.05757
6.27856	1.51544
1.35387	1.17419
0.259331	1.61211
1.21556	1.19921
0.0809492	1.12661
1.03474	1.22568
1.10026	1.24733
0.576542	0.532187
0.811862	0.573203
0.883795	0.628441
0.668369	0.638511
0.442267	0.854434
0.658913	0.575367
0.663676	0.789178
0.933459	0.696516
0.662107	0.646216
0.553333	0.635328

## Sheet: PGC1
mRNA expression of PGC1
Control	MG		AChR-Ab（-）	AchR-Ab	AchR-Ab
1.60882	0.631907			Control	MG
1.42998	0.708088		mRNA expression of PGC1	1.60882	0.631907
0.352574	0.595428			1.53901	0.168146
1.07624	0.0604548			0.437696	0.131397
1.14552	0.695372			0.857376	0.441964
0.869345	0.195312			0.839731	0.773782
1.04826	0.0665231			1.22944	1.19086
1.98343	0.0579118		Mean	1.08534	0.556342
0.513345	1.02792		SD	0.414797	0.365139
1.07773	0.21822
1.35849	0.77693
1.93455	0.139855
0.339622	1.08782
1.53901	0.168146
0.727995	0.154519
0.592957	0.377281
0.75054	0.0479584
1.5977	0.74935
1.93992	1.81511
0.724973	0.187087
0.957935	0.378348
1.56699	1.0367
0.437696	0.131397
1.77522	0.038047
0.857376	0.877603
1.98618	0.102086
0.496546	0.58554
1.12506	0.0234219
1.98618	0.0319952
0.45376	0.228424
0.857376	0.441964
1.71475	0.726841
0.43167	0.444435
2.12579	0.262793
0.741234	0.0245523
1.01255	0.123279
0.839731	0.773782
0.50278	0.0665231
1.75078	0.072293
1.33607	0.707107
1.967	0.054404
0.724973	0.314618
0.428094	0.745355
0.983502	0.029894
1.66555	0.416388
0.906262	0.59957
2.67215	0.107901
0.469111	0.316878
0.715984	0.172412
1.22944	1.19086

## Sheet: NRF1
mRNA expression of NRF1
Control	MG		AChR-Ab（-）	AchR-Ab	AchR-Ab
0.808817	0.305307			Control	MG
0.929985	0.772595		mRNA expression of NRF1	0.808817	0.305307
0.952574	0.314694			0.914194	0.267175
1.07624	0.306274			0.918045	0.263497
1.29678	0.378492			0.853933	0.0916323
0.918622	0.456916			0.951229	0.240779
1.10768	0.517597			1.30457	0.730919
1.14485	0.528509		Mean	0.958465	0.316552
0.75378	0.521233		SD	0.161636	0.197235
1.13882	0.986185
1.48023	0.925166
1.0183	0.842379
0.914863	0.371713
0.914194	0.267175
0.793233	0.667937
0.8028	0.281613
1.01615	0.472551
0.809226	0.09447
1.54333	0.525508
0.981535	0.0353046
1.19213	0.513268
0.705611	0.0172412
0.918045	0.263497
1.21364	1.03341
1.06698	0.771563
1.46828	0.447446
0.909319	0.515237
1.28434	0.486255
1.12581	0.0350122
0.518002	0.0113907
0.853933	0.0916323
1.70787	0.399386
0.82833	1.21259
1.12127	0.12345
0.738257	1.62676
1.06689	1.31065
0.951229	0.240779
0.884796	0.93553
0.791074	0.0694408
1.40778	0.385024
1.15553	0.320056
0.785125	0.730016
0.896801	1.21606
1.0651	0.327566
1.15396	0.270931
0.961645	0.338787
1.13767	0.404961
0.922224	0.951176
0.75974	0.343358
1.30457	0.730919

## Sheet: TFAM
mRNA expression of TFAM
Control	MG		AChR-Ab（-）	AchR-Ab	AchR-Ab
0.948386	0.6521			Control	MG
0.948542	0.9421		mRNA expression of TFAM	0.948386	0.6521
2.28582	0.4256			1.82886	0.4125
0.473301	0.52378			0.778878	0.6541
1.02749	0.5584			1.62422	0.51452
1.18133	0.64123			1.62057	0.32514
2.71002	0.85413			0.910466	0.8524
0.962813	0.62152		Mean	1.28523	0.56846
0.590852	0.44155		SD	0.41497	0.173872
0.549081	0.6521
2.66726	0.654
1.12361	0.6584
0.288677	0.8453
1.82886	0.4125
0.632011	0.6587
1.47377	0.36574
1.84977	0.6482
0.997179	0.9541
0.600069	0.7548
0.613022	0.8421
2.08081	0.4014
2.28956	0.4561
0.778878	0.6541
0.356969	0.5624
0.754944	0.6548
1.29459	0.4514
0.660422	0.6524
0.523438	0.45621
1.13539	0.514221
1.96806	0.53265
1.62422	0.51452
1.61421	0.62541
0.66514	0.32541
2.07876	0.45213
0.275852	0.4544
2.04072	0.35654
1.62057	0.32514
1.14195	0.3542
0.71326	0.41562
0.371239	0.521446
0.863358	0.5785
0.822483	0.5146
1.15756	0.7654
1.262	0.4125
0.964006	0.5122
1.52298	0.5462
0.592429	0.5114
0.407066	0.6521
2.99049	0.7456
0.910466	0.8524
